# Supplementary material
Source: HighWire-hosted journal article supplement (https://cmaj.ca/highwire/filestream/148605/field_highwire_adjunct_files/0/221303-res-1-at.pdf)
Supplement: 221303-res-1-at.pdf [file 221303-res-1-at.pdf]

## Appendix

Supplementary method

Supplementary Table 1: The International Classification of Diseases, Ninth Revision, (ICD-9) codes for case identification.

Supplementary Table 2: The ICD-9 codes for cancer-predisposing conditions exclusion.

Supplementary Table 3: Dosimetry reference from Gao *et al.*(1) of organ-absorbed radiation dose from different computed tomographic scan types.

Supplementary Table 4: Dosimetry reference Kim *et al.*(2) of organ-absorbed radiation dose from different computed tomographic scan types.

Supplementary Table 5: Exposure status of other radiology and nuclear medicine procedures in the case and the control group.

Supplementary Table 6: Adjusted odds ratio for intracranial tumors, leukemia and lymphomas related to the total number of computed tomographic (CT) scans using different lag periods

Supplementary Table 7: The estimated effects of number of CT scans, total number of experienced high-radiation procedures, and other covariates for the conditional logistic regression models

Supplementary Table 8: Using radiation dosimetry from Kim *et al.*(2) to estimate adjusted odds ratio for intracranial tumors, leukemia, and lymphomas related to the organ-specific cumulative dose from CT scans.

## Supplementary Method

In this study, we applied CT radiation dosimetry data published by Gao *et al.* in 2018 to estimate the specific organ-observed radiation dosage after CT examination in the primary analysis.(1) In the sensitivity analysis, we re-calculated the organ-observed dosage using data from Kim *et al.* published in 2012.(2) In Gao's study,(1) the authors collected the patient-specific CT parameters and body size information from 1250 CT examinations performed on 1250 pediatric patients. Due to the body stature varied greatly across children at different ages and sexes, this study also created anthropomorphic phantoms with various sizes for effective radiation dosage assessment. The authors also compared the outcome with previous literature using different method, and the results were consistent. For this reason, we used this data for our primary analysis.

Kim and colleagues published a CT radiation dosimetry study in 2012 evaluated by human phantoms with varying size from infants to adults.(2) Instead of using actual setting of performed CT examinations, this study employed CT scanning parameters from a national survey of CT technicians. As a pioneer study in the organ-effective radiation dosage from CT scans in pediatric population, little previous literature was available for comparison. We used this data to conduct the sensitivity analysis.

| Supplementary table 1: The ICD-9 codes for case identification. |                                                                             |                            |
|-----------------------------------------------------------------|-----------------------------------------------------------------------------|----------------------------|
| ICD-9 code                                                      | Description                                                                 | Number of identified cases |
| <b>Intracranial tumor</b>                                       |                                                                             |                            |
| 191                                                             | Malignant neoplasm of brain                                                 | 2013                       |
| 192                                                             | Malignant neoplasm of cranial nerves                                        | 182                        |
| 192.1                                                           | Malignant neoplasm of cerebral meninges                                     | 5                          |
| 194.3                                                           | Malignant neoplasm of pituitary gland and craniopharyngeal duct             | 13                         |
| 194.4                                                           | Malignant neoplasm of pineal gland                                          | 24                         |
| 225.0                                                           | Benign neoplasm of brain                                                    | 5                          |
| 225.1                                                           | Benign neoplasm of cranial nerves                                           | 0                          |
| 225.2                                                           | Benign neoplasm of cerebral meninges                                        | <3 <sup>a</sup>            |
| 227.3                                                           | Benign neoplasm of pituitary gland and craniopharyngeal duct                | <3 <sup>a</sup>            |
| 227.4                                                           | Benign neoplasm of pineal gland                                             | 0                          |
| 237.0                                                           | Neoplasm of uncertain behavior of pituitary gland and craniopharyngeal duct | 0                          |
| 237.1                                                           | Neoplasm of uncertain behavior of pineal gland                              | 0                          |
| 237.5                                                           | Neoplasm of uncertain behavior of brain and spinal cord                     | 0                          |
| 237.6                                                           | Neoplasm of uncertain behavior of meninges                                  | 0                          |
| 239.6                                                           | Neoplasm of unspecified nature of brain                                     | <3 <sup>a</sup>            |
| <b>Leukemia</b>                                                 |                                                                             |                            |
| 204.0                                                           | Lymphoid leukemia acute                                                     | 2183                       |
| 204.1                                                           | Lymphoid leukemia chronic                                                   | 16                         |
| 204.2                                                           | Lymphoid leukemia subacute                                                  | <3 <sup>a</sup>            |
| 204.8                                                           | Other lymphoid leukemia                                                     | 0                          |
| 204.9                                                           | Unspecified lymphoid leukemia                                               | 9                          |
| 205.0                                                           | Myeloid leukemia acute                                                      | 1097                       |
| 205.1                                                           | Myeloid leukemia chronic                                                    | 195                        |
| 205.2                                                           | Myeloid leukemia subacute                                                   | 5                          |
| 205.3                                                           | Myeloid sarcoma                                                             | 7                          |
| 205.8                                                           | Other myeloid leukemia                                                      | 2                          |
| 205.9                                                           | Unspecified myeloid leukemia                                                | 12                         |
| 206.0                                                           | Monocytic leukemia acute                                                    | 5                          |
| 206.1                                                           | Monocytic leukemia chronic                                                  | <3 <sup>a</sup>            |
| 206.2                                                           | Monocytic leukemia subacute                                                 | 0                          |
| 206.8                                                           | Other monocytic leukemia                                                    | <3 <sup>a</sup>            |
| 206.9                                                           | Unspecified monocytic leukemia                                              | <3 <sup>a</sup>            |
| 207.0                                                           | Acute erythremia and erythroleukemia                                        | 14                         |
| 207.1                                                           | Chronic erythremia                                                          | 0                          |
| 207.2                                                           | Megakaryocytic leukemia                                                     | <3 <sup>a</sup>            |
| 207.8                                                           | Other specified leukemia                                                    | 3                          |
| 208.0                                                           | Leukemia of unspecified cell type acute                                     | 88                         |
| 208.1                                                           | Leukemia of unspecified cell type chronic                                   | 3                          |
| 208.2                                                           | Leukemia of unspecified cell type subacute                                  | 0                          |

|                      |                                                                                            |                 |
|----------------------|--------------------------------------------------------------------------------------------|-----------------|
| 208.8                | Other leukemia of unspecified cell type                                                    | <3 <sup>a</sup> |
| 208.9                | Unspecified leukemia                                                                       | 21              |
| 238.72               | Low grade myelodysplastic syndrome lesions                                                 | 0               |
| 238.73               | High grade myelodysplastic syndrome lesions                                                | 0               |
| 238.74               | Myelodysplastic syndrome with 5q deletion                                                  | 0               |
| 238.75               | Myelodysplastic syndrome, unspecified                                                      | 0               |
| Non-Hodgkin lymphoma |                                                                                            |                 |
| 200                  | Lymphosarcoma and reticulosarcoma and other specified malignant tumors of lymphatic tissue | 310             |
| 202.0                | Nodular lymphoma                                                                           | 630             |
| 202.1                | Mycosis fungoides                                                                          | 14              |
| 202.2                | Sezary's disease                                                                           | 0               |
| 202.7                | Peripheral t-cell lymphoma                                                                 | 0               |
| 202.8                | Other malignant lymphomas                                                                  | 377             |
| Hodgkin lymphoma     |                                                                                            |                 |
| 201                  | Hodgkin's disease                                                                          | 564             |
| Total                |                                                                                            | 7807            |

---

<sup>a</sup>Due to the policy on protecting confidentiality, cells with a value of 1 or 2 were labeled as <3.

---

| Supplementary Table 2: The ICD-9 codes for cancer-predisposing conditions exclusion. |                                            |                          |
|--------------------------------------------------------------------------------------|--------------------------------------------|--------------------------|
| ICD-9 code                                                                           | Description                                | Number of excluded cases |
| 042                                                                                  | Human immunodeficiency virus [HIV] disease | <3 <sup>a</sup>          |
| 237.7                                                                                | Neurofibromatosis                          | 8                        |
| 279.0                                                                                | Deficiency of humoral immunity             | 4                        |
| 279.1                                                                                | Deficiency of cell-mediated immunity       | <3 <sup>a</sup>          |
| 279.2                                                                                | Combined immunity deficiency               | 0                        |
| 279.3                                                                                | Unspecified immunity deficiency            | <3 <sup>a</sup>          |
| 279.5                                                                                | Graft-versus-host disease                  | 0                        |
| 758                                                                                  | Chromosomal anomalies                      | 47                       |
| 996.8                                                                                | Complications of transplanted organ        | <3 <sup>a</sup>          |
| V42                                                                                  | Organ or tissue replaced by transplant     | 6                        |
| V84                                                                                  | Genetic susceptibility to disease          | 0                        |
| Total                                                                                |                                            | 72                       |

<sup>a</sup>Due to the policy on protecting confidentiality, cells with a value of 1 or 2 were labeled as <3.

Supplementary Table 3. Dosimetry reference from Gao *et al.*(1) of organ-absorbed radiation dose from different computed tomographic scan types

| Age (year) | Sex | Site    | Dose to red bone marrow (mGy) | Dose to brain (mGy) |
|------------|-----|---------|-------------------------------|---------------------|
| ≤6         | M   | Head    | 9                             | 32                  |
| ≤6         | F   | Head    | 10.2                          | 36.1                |
| >6 ~ ≤11   | M   | Head    | 11.2                          | 30.9                |
| >6 ~ ≤11   | F   | Head    | 11.6                          | 32                  |
| >11 ~ ≤16  | M   | Head    | 15.5                          | 43                  |
| >11 ~ ≤16  | F   | Head    | 14.9                          | 41.2                |
| >16 ~ ≤18  | M   | Head    | 15.3                          | 46.4                |
| >16 ~ ≤18  | F   | Head    | 15.6                          | 48.7                |
| ≤6         | M   | Chest   | 2.3                           | 0.2                 |
| ≤6         | F   | Chest   | 2.2                           | 0.2                 |
| >6 ~ ≤11   | M   | Chest   | 2.7                           | 0.2                 |
| >6 ~ ≤11   | F   | Chest   | 2.4                           | 0.2                 |
| >11 ~ ≤16  | M   | Chest   | 2.4                           | 0.2                 |
| >11 ~ ≤16  | F   | Chest   | 2.6                           | 0.2                 |
| >16 ~ ≤18  | M   | Chest   | 2                             | 0.2                 |
| >16 ~ ≤18  | F   | Chest   | 1.8                           | 0.2                 |
| ≤6         | M   | Abdomen | 2.4                           | 0.1                 |
| ≤6         | F   | Abdomen | 3.4                           | 0.1                 |
| >6 ~ ≤11   | M   | Abdomen | 3.5                           | 0                   |
| >6 ~ ≤11   | F   | Abdomen | 3.5                           | 0                   |
| >11 ~ ≤16  | M   | Abdomen | 4.5                           | 0                   |
| >11 ~ ≤16  | F   | Abdomen | 4.2                           | 0                   |
| >16 ~ ≤18  | M   | Abdomen | 4                             | 0                   |
| >16 ~ ≤18  | F   | Abdomen | 3.8                           | 0                   |

mGy: milligray

Supplementary Table 4: Dosimetry reference Kim *et al.*(2) of organ-absorbed radiation dose from different computed tomographic scan types

| Age (year) | Sex | Site  | Dose to brain (mGy) | Dose to red bone marrow (mGy) |
|------------|-----|-------|---------------------|-------------------------------|
| 0          | M   | Head  | 27.5                | 8.0                           |
| 0          | F   | Head  | 27.5                | 8.0                           |
| 1          | M   | Head  | 23.2                | 8.4                           |
| 1          | F   | Head  | 23.2                | 8.4                           |
| 2          | M   | Head  | 24.4                | 8.5                           |
| 2          | F   | Head  | 24.4                | 8.5                           |
| 3          | M   | Head  | 25.6                | 8.5                           |
| 3          | F   | Head  | 25.6                | 8.5                           |
| 4          | M   | Head  | 26.7                | 8.6                           |
| 4          | F   | Head  | 26.7                | 8.6                           |
| 5          | M   | Head  | 27.9                | 8.6                           |
| 5          | F   | Head  | 27.9                | 8.6                           |
| 6          | M   | Head  | 29.4                | 8.1                           |
| 6          | F   | Head  | 29.4                | 8.1                           |
| 7          | M   | Head  | 30.8                | 7.6                           |
| 7          | F   | Head  | 30.8                | 7.6                           |
| 8          | M   | Head  | 32.3                | 7.0                           |
| 8          | F   | Head  | 32.3                | 7.0                           |
| 9          | M   | Head  | 33.7                | 6.5                           |
| 9          | F   | Head  | 33.7                | 6.5                           |
| 10         | M   | Head  | 35.2                | 6.0                           |
| 10         | F   | Head  | 35.2                | 6.0                           |
| 11         | M   | Head  | 36.7                | 5.6                           |
| 11         | F   | Head  | 37.0                | 5.9                           |
| 12         | M   | Head  | 38.1                | 5.3                           |
| 12         | F   | Head  | 38.8                | 5.8                           |
| 13         | M   | Head  | 39.6                | 5.0                           |
| 13         | F   | Head  | 40.6                | 5.7                           |
| 14         | M   | Head  | 41.1                | 4.7                           |
| 14         | F   | Head  | 42.4                | 5.6                           |
| 15         | M   | Head  | 42.5                | 4.4                           |
| 15         | F   | Head  | 44.2                | 5.5                           |
| 16         | M   | Head  | 41.1                | 3.8                           |
| 16         | F   | Head  | 43.7                | 4.8                           |
| 17         | M   | Head  | 39.6                | 3.2                           |
| 17         | F   | Head  | 43.3                | 4.1                           |
| 18         | M   | Head  | 38.1                | 2.7                           |
| 18         | F   | Head  | 42.8                | 3.4                           |
| 0          | M   | Chest | 0.4                 | 4.2                           |

|    |   |         |     |     |
|----|---|---------|-----|-----|
| 0  | F | Chest   | 0.4 | 4.2 |
| 1  | M | Chest   | 0.3 | 3.9 |
| 1  | F | Chest   | 0.3 | 3.9 |
| 2  | M | Chest   | 0.3 | 3.6 |
| 2  | F | Chest   | 0.3 | 3.6 |
| 3  | M | Chest   | 0.3 | 3.2 |
| 3  | F | Chest   | 0.3 | 3.2 |
| 4  | M | Chest   | 0.3 | 2.9 |
| 4  | F | Chest   | 0.3 | 2.9 |
| 5  | M | Chest   | 0.3 | 2.5 |
| 5  | F | Chest   | 0.3 | 2.5 |
| 6  | M | Chest   | 0.3 | 2.7 |
| 6  | F | Chest   | 0.3 | 2.7 |
| 7  | M | Chest   | 0.3 | 2.8 |
| 7  | F | Chest   | 0.3 | 2.8 |
| 8  | M | Chest   | 0.3 | 3.0 |
| 8  | F | Chest   | 0.3 | 3.0 |
| 9  | M | Chest   | 0.3 | 3.1 |
| 9  | F | Chest   | 0.3 | 3.1 |
| 10 | M | Chest   | 0.3 | 3.3 |
| 10 | F | Chest   | 0.3 | 3.3 |
| 11 | M | Chest   | 0.3 | 3.4 |
| 11 | F | Chest   | 0.3 | 3.5 |
| 12 | M | Chest   | 0.3 | 3.5 |
| 12 | F | Chest   | 0.3 | 3.6 |
| 13 | M | Chest   | 0.3 | 3.7 |
| 13 | F | Chest   | 0.3 | 3.8 |
| 14 | M | Chest   | 0.2 | 3.8 |
| 14 | F | Chest   | 0.3 | 3.9 |
| 15 | M | Chest   | 0.2 | 3.9 |
| 15 | F | Chest   | 0.3 | 4.1 |
| 16 | M | Chest   | 0.2 | 3.9 |
| 16 | F | Chest   | 0.3 | 4.1 |
| 17 | M | Chest   | 0.2 | 3.9 |
| 17 | F | Chest   | 0.3 | 4.1 |
| 18 | M | Chest   | 0.2 | 3.9 |
| 18 | F | Chest   | 0.3 | 4.1 |
| 0  | M | Abdomen | 0.2 | 2.8 |
| 0  | F | Abdomen | 0.2 | 2.8 |
| 1  | M | Abdomen | 0.1 | 2.5 |
| 1  | F | Abdomen | 0.1 | 2.5 |
| 2  | M | Abdomen | 0.1 | 2.3 |



|    |   |         |     |     |
|----|---|---------|-----|-----|
| 2  | F | Abdomen | 0.1 | 2.3 |
| 3  | M | Abdomen | 0.1 | 2.1 |
| 3  | F | Abdomen | 0.1 | 2.1 |
| 4  | M | Abdomen | 0.1 | 1.8 |
| 4  | F | Abdomen | 0.1 | 1.8 |
| 5  | M | Abdomen | 0.1 | 1.6 |
| 5  | F | Abdomen | 0.1 | 1.6 |
| 6  | M | Abdomen | 0.1 | 1.8 |
| 6  | F | Abdomen | 0.1 | 1.8 |
| 7  | M | Abdomen | 0.1 | 2.1 |
| 7  | F | Abdomen | 0.1 | 2.1 |
| 8  | M | Abdomen | 0.1 | 2.3 |
| 8  | F | Abdomen | 0.1 | 2.3 |
| 9  | M | Abdomen | 0.1 | 2.6 |
| 9  | F | Abdomen | 0.1 | 2.6 |
| 10 | M | Abdomen | 0.1 | 2.8 |
| 10 | F | Abdomen | 0.1 | 2.8 |
| 11 | M | Abdomen | 0.0 | 2.8 |
| 11 | F | Abdomen | 0.0 | 2.9 |
| 12 | M | Abdomen | 0.0 | 2.8 |
| 12 | F | Abdomen | 0.0 | 3.0 |
| 13 | M | Abdomen | 0.0 | 2.8 |
| 13 | F | Abdomen | 0.0 | 3.1 |
| 14 | M | Abdomen | 0.0 | 2.8 |
| 14 | F | Abdomen | 0.0 | 3.1 |
| 15 | M | Abdomen | 0.0 | 2.8 |
| 15 | F | Abdomen | 0.0 | 3.2 |
| 16 | M | Abdomen | 0.0 | 2.8 |
| 16 | F | Abdomen | 0.0 | 3.3 |
| 17 | M | Abdomen | 0.0 | 2.8 |
| 17 | F | Abdomen | 0.0 | 3.4 |
| 18 | M | Abdomen | 0.0 | 2.8 |
| 18 | F | Abdomen | 0.0 | 3.5 |

---

mGy: milligray

---

| Supplementary Table 5: Exposure status of other radiology and nuclear medicine procedures in the case and the control group. |                |                   |                                       |
|------------------------------------------------------------------------------------------------------------------------------|----------------|-------------------|---------------------------------------|
| Status                                                                                                                       | Case group (%) | Control group (%) | <i>p</i> value by Fisher's exact test |
| Cystography                                                                                                                  |                |                   |                                       |
| Exposed                                                                                                                      | 18 (0.2)       | 243 (0.3)         | 0.26                                  |
| Non-exposed                                                                                                                  | 7789 (99.8)    | 77814 (99.7)      |                                       |
| Cardiac catheterization                                                                                                      |                |                   |                                       |
| Exposed                                                                                                                      | 8 (0.1)        | 63 (0.1)          | 0.53                                  |
| Non-exposed                                                                                                                  | 7799 (99.9)    | 77994 (99.9)      |                                       |
| Renal cortical scan                                                                                                          |                |                   |                                       |
| Exposed                                                                                                                      | 3 (0.0)        | 59 (0.1)          | 0.37                                  |
| Non-exposed                                                                                                                  | 7804 (100.0)   | 77998 (99.9)      |                                       |
| Dynamic renography                                                                                                           |                |                   |                                       |
| Exposed                                                                                                                      | 4 (0.1)        | 35 (0.0)          | 0.78                                  |
| Non-exposed                                                                                                                  | 7803 (99.9)    | 78022 (100.0)     |                                       |
| Other nuclear procedures <sup>a</sup>                                                                                        |                |                   |                                       |
| Exposed                                                                                                                      | 7 (0.1)        | 79 (0.1)          | 0.99                                  |
| Non-exposed                                                                                                                  | 7800 (99.9)    | 77978 (99.9)      |                                       |

<sup>a</sup>Including positron emission tomography, skeletal scintigraphy, lung perfusion scan, hepatobiliary scintigraphy, Meckel's scan and gastric emptying tests.

Supplementary Table 6: Adjusted odds ratio for intracranial tumors, leukemia and lymphomas related to the total number of computed tomographic (CT) scans using different lag periods

| Number of CT scan(s)                                   | Intracranial tumors |              |                    | Leukemia  |              |                   | Non-Hodgkin lymphoma |              |                   | Hodgkin lymphoma |              |                   |
|--------------------------------------------------------|---------------------|--------------|--------------------|-----------|--------------|-------------------|----------------------|--------------|-------------------|------------------|--------------|-------------------|
|                                                        | Cases (n)           | Controls (n) | aOR (95% CI)       | Cases (n) | Controls (n) | aOR (95% CI)      | Cases (n)            | Controls (n) | aOR (95% CI)      | Cases (n)        | Controls (n) | aOR (95% CI)      |
| Lag period: 1 year                                     |                     |              |                    |           |              |                   |                      |              |                   |                  |              |                   |
| 0                                                      |                     |              | 1                  |           |              | 1                 |                      |              | 1                 |                  |              | 1                 |
| 1                                                      | 37                  | 316          | 1.23 (0.87-1.74)   | 41        | 482          | 0.85 (0.62-1.18)  | 15                   | 170          | 0.90 (0.53-1.54)  | 6                | 87           | 0.69 (0.30-1.59)  |
| 2 or 3                                                 | 43                  | 120          | 3.67 (2.57-5.24)   | 17        | 211          | 0.81 (0.49-1.32)  | 13                   | 86           | 1.54 (0.86-2.78)  | 3                | 50           | 0.58 (0.18-1.88)  |
| ≥4                                                     | 20                  | 11           | 17.52 (8.37-36.69) | 6         | 17           | 3.65 (1.42-9.35)  | 7                    | 13           | 5.41 (2.16-13.57) | <3 <sup>a</sup>  | 5            | 2.12 (0.25-18.27) |
| Lag period: 2 years                                    |                     |              |                    |           |              |                   |                      |              |                   |                  |              |                   |
| 0                                                      |                     |              | 1                  |           |              | 1                 |                      |              | 1                 |                  |              | 1                 |
| 1                                                      | 24                  | 252          | 0.98 (0.64-1.5)    | 30        | 390          | 0.77 (0.53-1.12)  | 11                   | 139          | 0.80 (0.43-1.49)  | 5                | 79           | 0.62 (0.25-1.55)  |
| 2 or 3                                                 | 25                  | 100          | 2.53 (1.62-3.94)   | 13        | 172          | 0.75 (0.43-1.32)  | 9                    | 75           | 1.21 (0.60-2.42)  | <3 <sup>a</sup>  | 50           | 0.19 (0.03-1.39)  |
| ≥4                                                     | 12                  | 8            | 13.89 (5.66-34.10) | 6         | 15           | 4.14 (1.58-10.8)  | 6                    | 7            | 8.66 (2.91-25.78) | <3 <sup>a</sup>  | 3            | 3.60 (0.37-34.97) |
| Lag period: 3 years (the main result of present study) |                     |              |                    |           |              |                   |                      |              |                   |                  |              |                   |
| 0                                                      |                     |              | 1                  |           |              | 1                 |                      |              | 1                 |                  |              | 1                 |
| 1                                                      | 14                  | 205          | 0.69 (0.40-1.20)   | 21        | 309          | 0.68 (0.43-1.05)  | 10                   | 116          | 0.87 (0.45-1.68)  | 5                | 71           | 0.70 (0.28-1.74)  |
| 2 or 3                                                 | 18                  | 77           | 2.36 (1.40-3.97)   | 9         | 126          | 0.71 (0.36-1.40)  | 6                    | 59           | 1.02 (0.44-2.38)  | <3 <sup>a</sup>  | 42           | 0.23 (0.03-1.68)  |
| ≥4                                                     | 6                   | 6            | 9.01 (2.89-28.11)  | 6         | 13           | 4.8 (1.79-12.84)  | 4                    | 6            | 6.76 (1.91-23.96) | <3 <sup>a</sup>  | 3            | 3.61 (0.37-35.08) |
| Lag period: 4 years                                    |                     |              |                    |           |              |                   |                      |              |                   |                  |              |                   |
| 0                                                      |                     |              | 1                  |           |              | 1                 |                      |              | 1                 |                  |              | 1                 |
| 1                                                      | 10                  | 155          | 0.64 (0.34-1.23)   | 14        | 254          | 0.55 (0.32-0.94)  | 8                    | 97           | 0.83 (0.40-1.73)  | 4                | 58           | 0.69 (0.25-1.92)  |
| 2 or 3                                                 | 9                   | 64           | 1.40 (0.69-2.84)   | 10        | 98           | 1.02 (0.53-1.96)  | 5                    | 44           | 1.14 (0.45-2.89)  | <3 <sup>a</sup>  | 34           | 0.56 (0.13-2.36)  |
| ≥4                                                     | 5                   | 5            | 8.96 (2.57-31.21)  | 3         | 10           | 3.01 (0.83-10.94) | <3 <sup>a</sup>      | 4            | 5.13 (0.94-28.05) | 0                | 3            | NA                |

aOR, odds ratios were adjusted by the year of cohort entry, annual family income (both as linear variable) and urbanization level (as categorical variable); CI, confidence interval; NA, not applicable.

<sup>a</sup>Due to the policy on protecting confidentiality, cells with a value of 1 or 2 were labeled as <3.

Supplementary Table 7: The estimated effects of number of CT scans, total number of experienced high-radiation procedures, and other covariates for the conditional logistic regression models.

|                                                        | Intracranial tumors<br>aOR (95% CI) | Leukemia<br>aOR (95% CI) | Non-Hodgkin lymphoma<br>aOR (95% CI) | Hodgkin lymphoma<br>aOR (95% CI) |
|--------------------------------------------------------|-------------------------------------|--------------------------|--------------------------------------|----------------------------------|
| 1 CT scan versus non-exposure                          | 0.70 (0.41~1.22)                    | 0.68 (0.43~1.05)         | 0.87 (0.45~1.67)                     | 0.70 (0.28~1.74)                 |
| 2~3 CT scans versus non-exposure                       | 2.47 (1.46~4.16)                    | 0.71 (0.36~1.39)         | 1.02 (0.44~2.37)                     | 0.23 (0.03~1.70)                 |
| ≥4 CT scans versus non-exposure                        | 12.09 (3.63~40.25)                  | 4.52 (1.67~12.21)        | 6.27 (1.73~22.74)                    | 3.79 (0.39~37.1)                 |
| Year of cohort entry                                   | 1.17 (1.02~1.34)                    | 1.21 (1.10~1.33)         | 1.28 (1.01~1.63)                     | 1.71 (0.95~3.08)                 |
| Annual family income (per 1000 NTD)                    | 0.99 (0.99~1.00)                    | 1.00 (1.00~1.00)         | 1.00 (1.00~1.00)                     | 1.00 (1.00~1.01)                 |
| City vs metropolis                                     | 1.01 (0.92~1.12)                    | 1.04 (0.96~1.12)         | 0.97 (0.85~1.10)                     | 0.79 (0.64~0.96)                 |
| Town vs metropolis                                     | 1.00 (0.81~1.23)                    | 1.09 (0.93~1.27)         | 1.15 (0.87~1.50)                     | 0.92 (0.60~1.42)                 |
| Rural area vs metropolis                               | 0.94 (0.73~1.22)                    | 0.96 (0.79~1.17)         | 1.14 (0.82~1.60)                     | 0.69 (0.38~1.25)                 |
| Miss vs metropolis                                     | 2.00 (1.45~2.77)                    | 1.03 (0.74~1.44)         | 1.15 (0.70~1.88)                     | 0.56 (0.20~1.54)                 |
| Total number of high-radiation procedures <sup>a</sup> | 0.44 (0.22~0.89)                    | 1.14 (0.87~1.49)         | 1.16 (0.73~1.84)                     | 0.81 (0.36~1.82)                 |

Lag period: 3 years.

aOR: adjusted odds ratio; 95% CI: 95% confident interval; NTD: New Taiwan Dollar.

<sup>a</sup>Including cardiac catheterization, cystography, renal cortical scan, dynamic renography, positron emission tomography, skeletal scintigraphy, lung perfusion scan, hepatobiliary scintigraphy, Meckel's scan and gastric emptying tests.

Supplementary Table 8: Adjusted odds ratios for intracranial tumors, leukemia, and lymphomas related to the cumulative organ-specific dose from CT scans, estimated using radiation dosimetry from Kim and colleagues.(2)

| Percentile of cumulative organ dose (absolute dose in mGy)               | Cases (n)       | Controls (n)    | aOR (95% CI)       |
|--------------------------------------------------------------------------|-----------------|-----------------|--------------------|
| <b>Intracranial tumors</b>                                               |                 |                 |                    |
| No exposure                                                              |                 |                 | 1                  |
| Brain dose 20 <sup>th</sup> percentile (>0~≤24.6)                        | 4               | 54              | 0.75 (0.27~2.08)   |
| Brain dose 21 <sup>st</sup> to 40 <sup>th</sup> percentile (>24.6~≤32.3) | 5               | 68              | 0.74 (0.30~1.86)   |
| Brain dose 41 <sup>st</sup> to 60 <sup>th</sup> percentile (>32.3~≤36.9) | <3 <sup>a</sup> | 53              | 0.38 (0.09~1.56)   |
| Brain dose 61 <sup>st</sup> to 80 <sup>th</sup> percentile (>36.9~≤53.4) | 5               | 33              | 1.53 (0.59~3.94)   |
| Brain dose 81 <sup>st</sup> to 100 <sup>th</sup> percentile (>53.4)      | 17              | 45              | 3.76 (2.13~6.65)   |
| Brain dose 99 <sup>th</sup> to 100 <sup>th</sup> percentile (>131.2)     | 5               | 3               | 14.97 (3.55-63.13) |
| <b>Leukemia</b>                                                          |                 |                 |                    |
| No exposure                                                              |                 |                 | 1                  |
| RBM dose 20 <sup>th</sup> percentile (>0~≤5.0)                           | 7               | 67              | 1.05 (0.48~2.30)   |
| RBM dose 21 <sup>st</sup> to 40 <sup>th</sup> percentile (>5.0~≤6.6)     | 7               | 85              | 0.83 (0.38~1.80)   |
| RBM dose 41 <sup>st</sup> to 60 <sup>th</sup> percentile (>6.6~≤8.5)     | 9               | 114             | 0.79 (0.40~1.57)   |
| RBM dose 61 <sup>st</sup> to 80 <sup>th</sup> percentile (>8.5~≤11.2)    | 4               | 69              | 0.56 (0.20~1.55)   |
| RBM dose 81 <sup>st</sup> to 100 <sup>th</sup> percentile (>11.2)        | 9               | 79              | 1.14 (0.57~2.28)   |
| RBM dose 99 <sup>th</sup> to 100 <sup>th</sup> percentile (>27.0)        | 3               | 6               | 5.01 (1.25~20.05)  |
| <b>Non-Hodgkin lymphoma</b>                                              |                 |                 |                    |
| No exposure                                                              |                 |                 | 1                  |
| RBM dose 20 <sup>th</sup> percentile (>0~≤5.0)                           | 5               | 42              | 1.21 (0.47~3.11)   |
| RBM dose 21 <sup>st</sup> to 40 <sup>th</sup> percentile (>5.0~≤6.6)     | 3               | 30              | 1.02 (0.31~3.36)   |
| RBM dose 41 <sup>st</sup> to 60 <sup>th</sup> percentile (>6.6~≤8.5)     | 5               | 41              | 1.22 (0.48~3.11)   |
| RBM dose 61 <sup>st</sup> to 80 <sup>th</sup> percentile (>8.5~≤11.2)    | <3 <sup>a</sup> | 21              | 0.48 (0.06~3.59)   |
| RBM dose 81 <sup>st</sup> to 100 <sup>th</sup> percentile (>11.2)        | 5               | 30              | 1.67 (0.65~4.31)   |
| RBM dose 99 <sup>th</sup> to 100 <sup>th</sup> percentile (>27.0)        | <3 <sup>a</sup> | <3 <sup>a</sup> | 4.69 (0.42~51.99)  |
| <b>Hodgkin lymphoma</b>                                                  |                 |                 |                    |
| No exposure                                                              |                 |                 | 1                  |
| RBM dose 20 <sup>th</sup> percentile (>0~≤5.0)                           | 4               | 30              | 1.35 (0.48-3.85)   |
| RBM dose 21 <sup>st</sup> to 40 <sup>th</sup> percentile (>5.0~≤6.6)     | <3 <sup>a</sup> | 27              | 0.36 (0.05-2.69)   |
| RBM dose 41 <sup>st</sup> to 60 <sup>th</sup> percentile (>6.6~≤8.5)     | 0               | 15              | NA                 |
| RBM dose 61 <sup>st</sup> to 80 <sup>th</sup> percentile (>8.5~≤11.2)    | <3 <sup>a</sup> | 14              | 0.70 (0.09-5.38)   |
| RBM 81 <sup>st</sup> to 100 <sup>th</sup> percentile (>11.2)             | 0               | 18              | NA                 |
| RBM dose 99 <sup>th</sup> to 100 <sup>th</sup> percentile (>27.0)        | 0               | <3 <sup>a</sup> | NA                 |

aOR, odds ratios were adjusted by the year of cohort entry, annual family income (both as linear variable) and urbanization level (as categorical variable); CI, confidence interval; mGy, milligray; RBM, red bone marrow.

<sup>a</sup>Due to the policy on protecting confidentiality, cells with a value of 1 or 2 were labeled as <3.

Reference:

1. Gao Y, Quinn B, Pandit-Taskar N, Behr G, Mahmood U, Long D, et al. Patient-specific organ and effective dose estimates in pediatric oncology computed tomography. *Phys Med*. 2018;45:146-55.
2. Kim KP, Berrington de González A, Pearce MS, Salotti JA, Parker L, McHugh K, et al. Development of a database of organ doses for paediatric and young adult CT scans in the United Kingdom. *Radiat Prot Dosimetry*. 2012;150(4):415-26.
